# Supplementary material
Source: HighWire-hosted journal article supplement (https://www.jneurosci.org/highwire/filestream/601205/field_highwire_adjunct_files/0/Supplemental_Figure.pdf)
Supplement: Supplemental_Figure.pdf [file Supplemental_Figure.pdf]

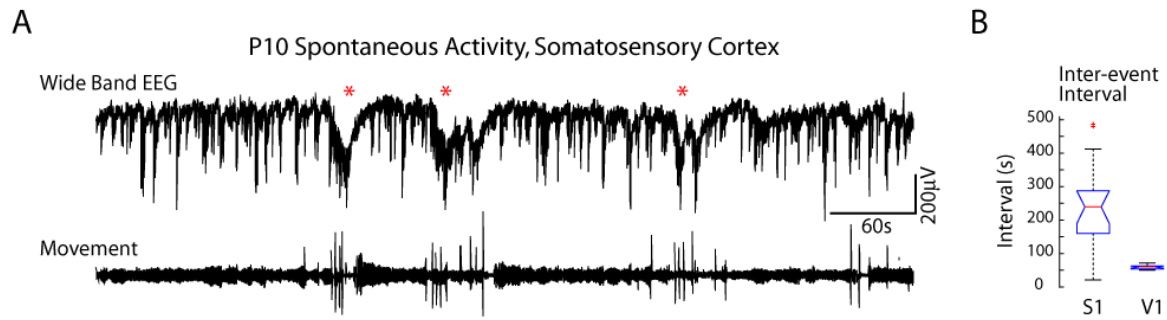

**Supplementary Figure 1. Infra-slow waves in somatosensory cortex.** **A.** Regularly recurring SATs were not observed in the forepaw region of S1. Instead we observed very long duration infra-slow waves (asterisk) that were irregularly spaced and occurred during periods of whole-body movement (lower trace). **B.** Inter-event interval for these events (60 from 3 pups P10-11). Box plot is described for Fig. 6. The variation in inter-event interval is much greater than for V1 SATs, which were tightly clustered around 60 s.
